# Supplementary material
Source: PubMed Central journal article supplement (PMC3351298)
Supplement: supp_M112.346411_jbc.M112.346411-1.pdf [file supp_M112.346411_jbc.M112.346411-1.pdf]

## Supporting Information

Kohn et al.

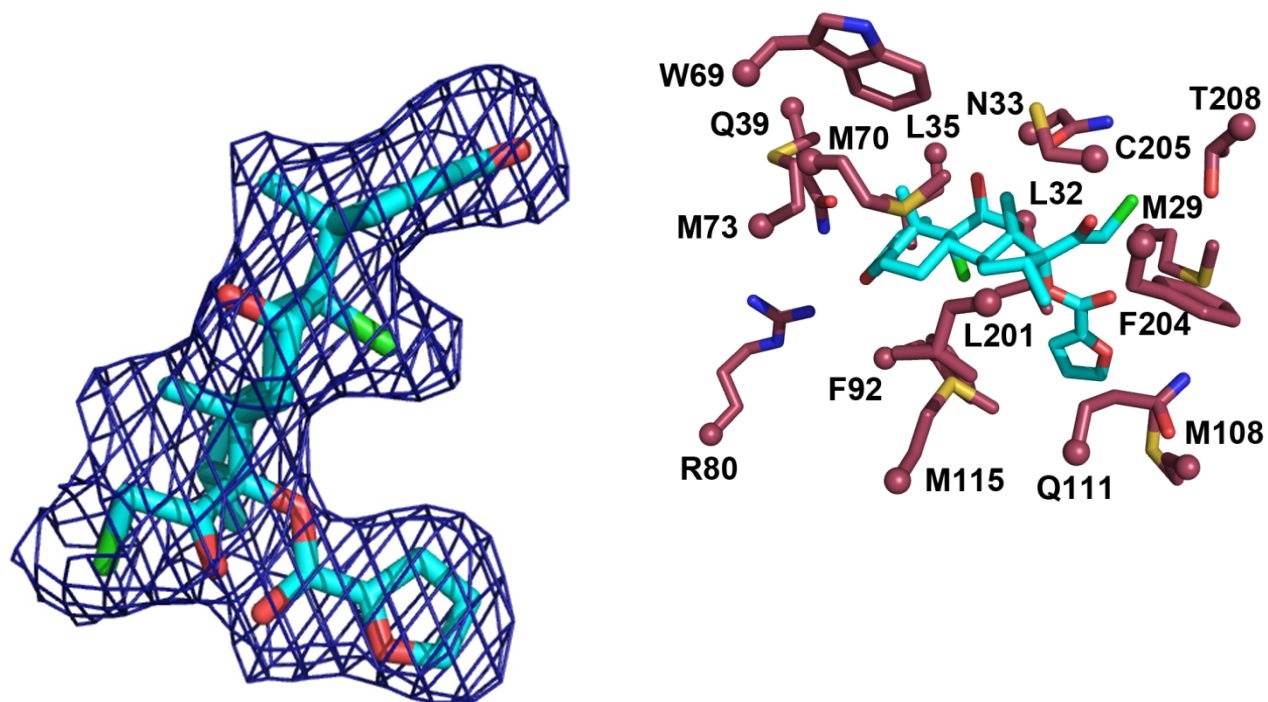

**Fig. S1.** (Left)  $F_0$ - $F_C$  omission map of MOF in the AncGR2 ligand binding pocket. (Right) MOF inside the AncGR2 ligand binding pocket with contacting residues shown.

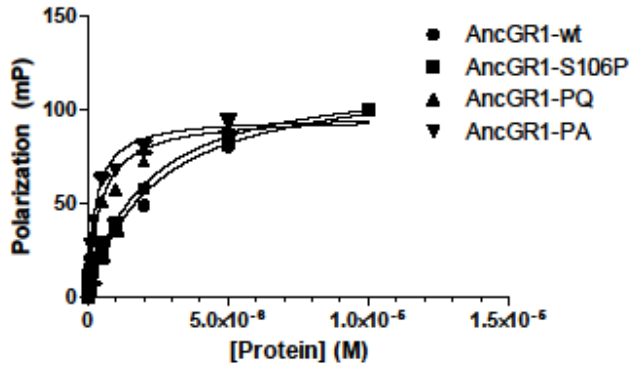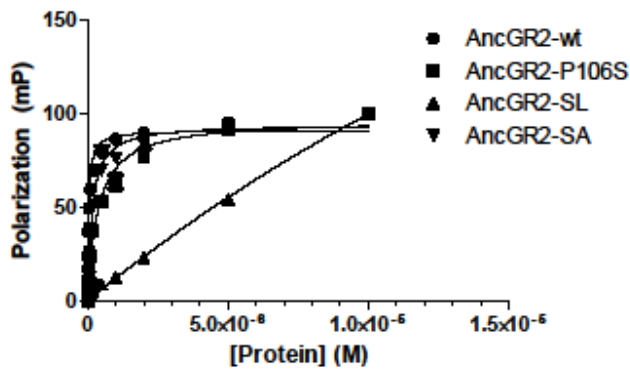

**Fig. S2.** Binding of dexamethasone-fluorescein (DM) to AncGR1 (*top*) and AncGR2 (*bottom*) wild-type and mutants were measured by fluorescence polarization in a buffer containing 12 nM DM, 150 mM NaCl, 10 mM HEPES pH 7.4, 5 mM DTT 3 mM EDTA and 0.005% Tween-20, and variable protein concentration of  $10^{-10}$  –  $10^{-5}$  M.
